# Supplementary material for: C5aR2 Regulates STING-Mediated Interferon Beta Production in Human Macrophages
Source: MDPI journal article supplement (doi:10.3390/cells12232707), 2023-11-25

Figure S1

A

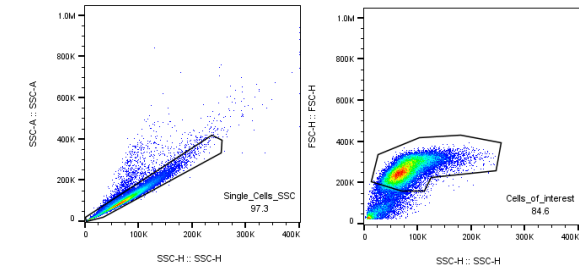

B

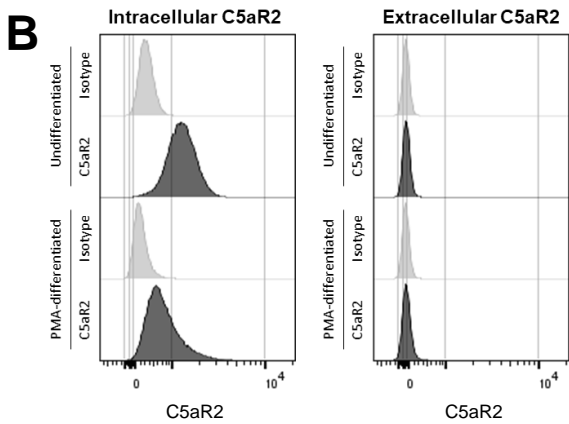

C

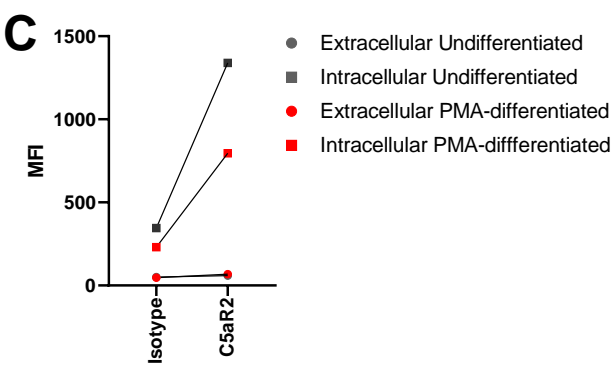

D

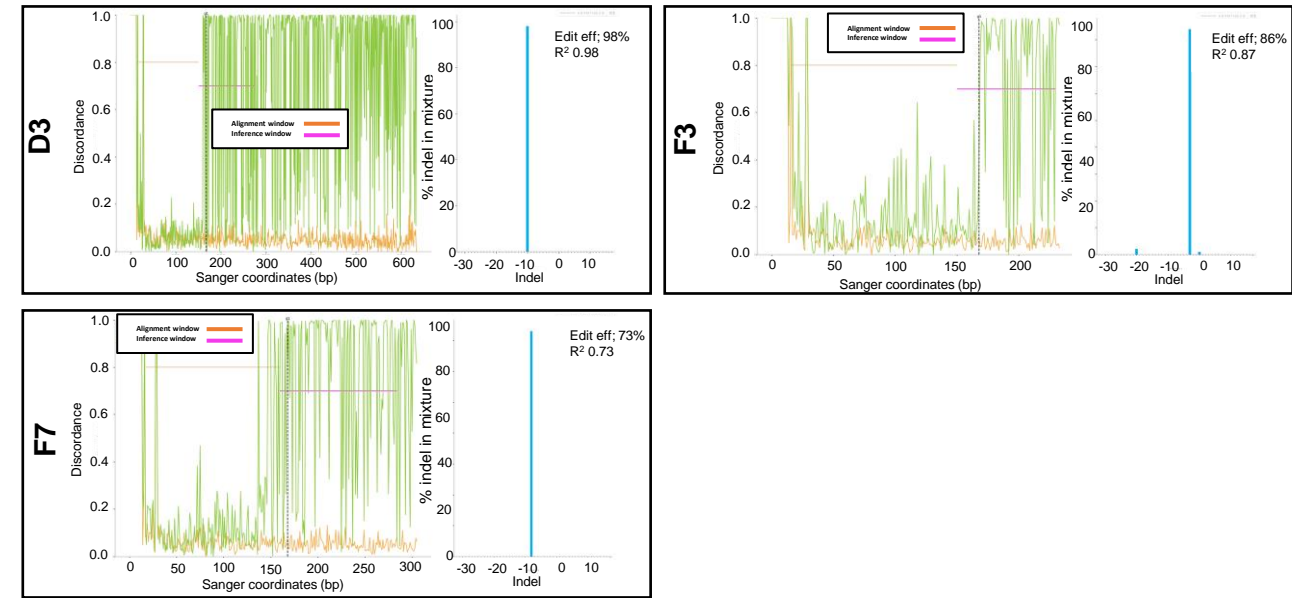

Figure S2

A

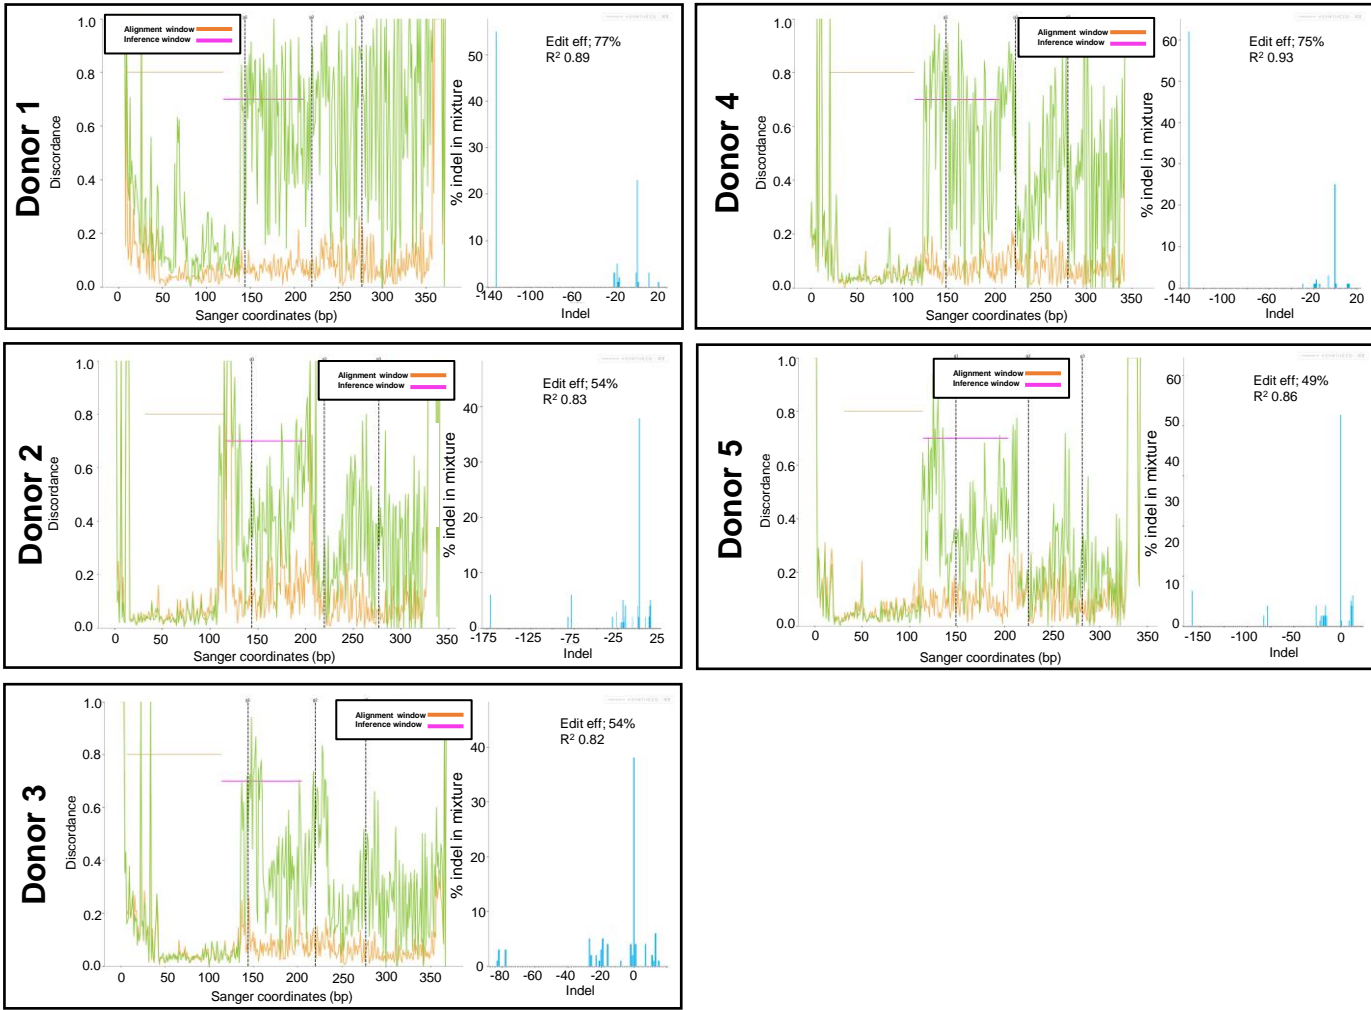

B

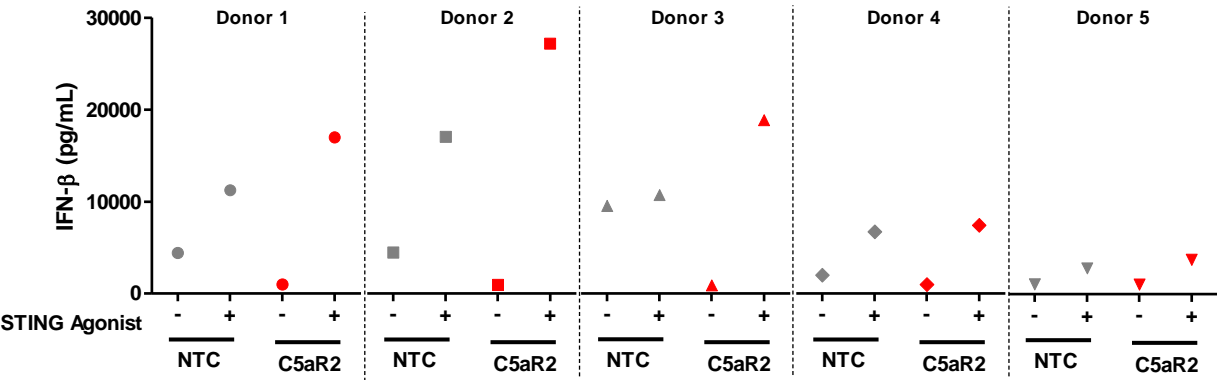

Figure S3

A

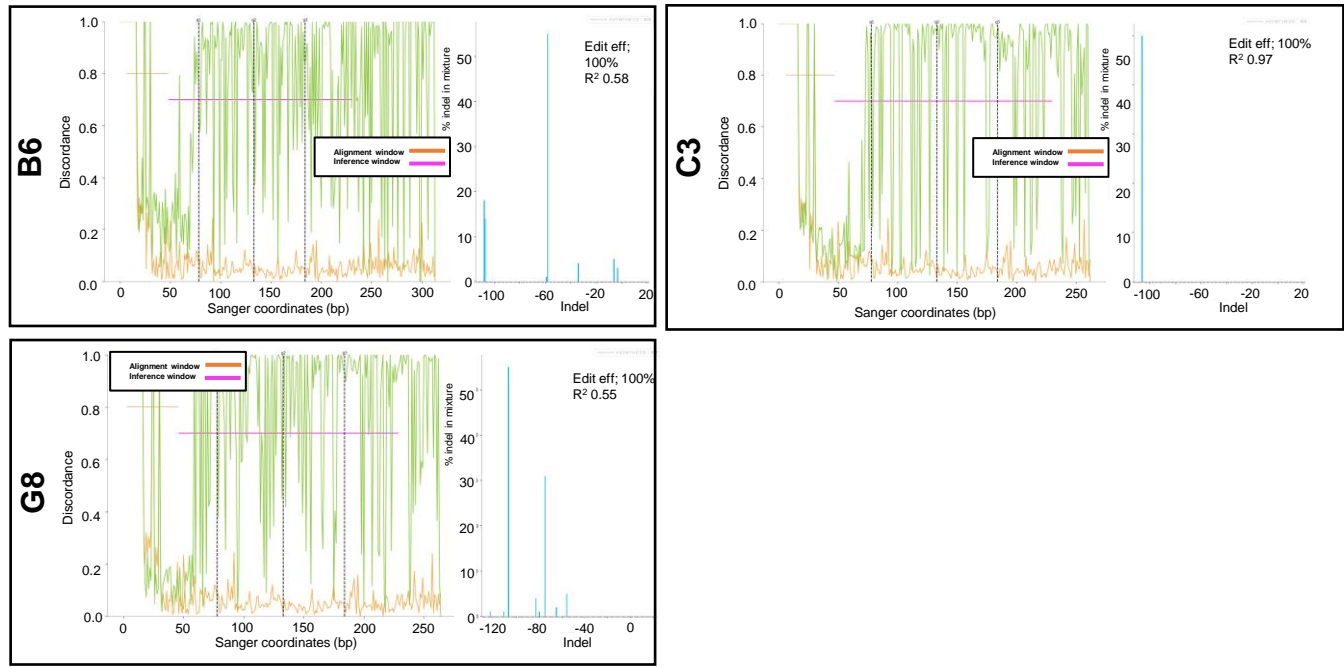

B

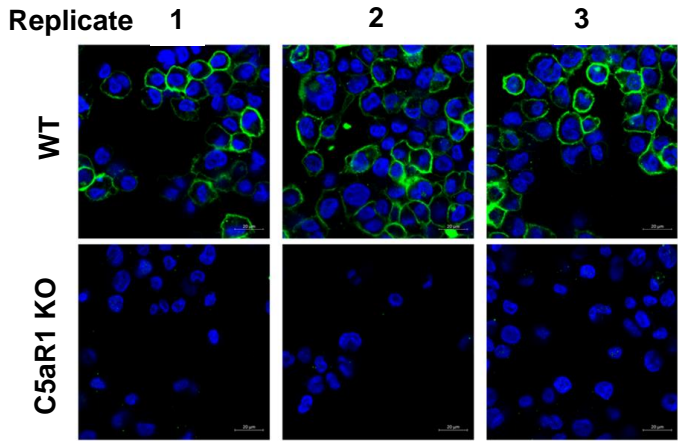

C

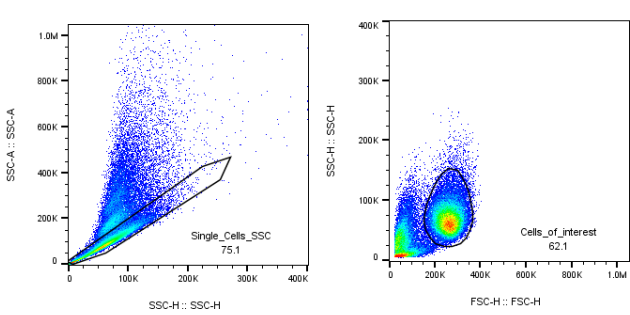

D

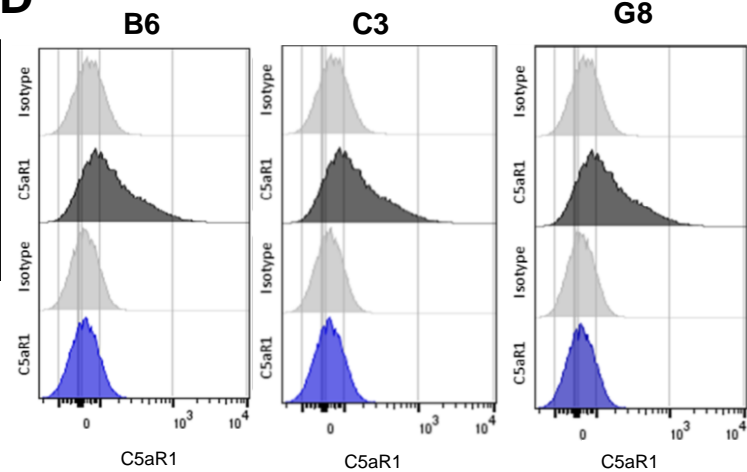

Figure S4

A

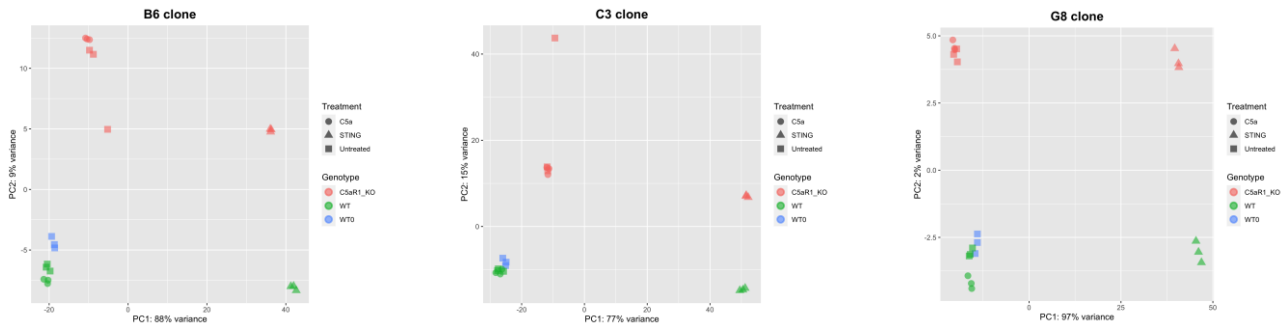

B

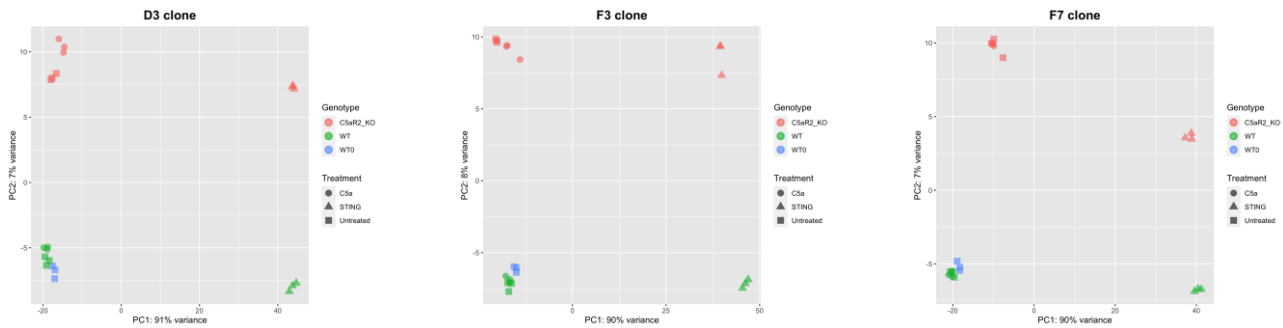

C

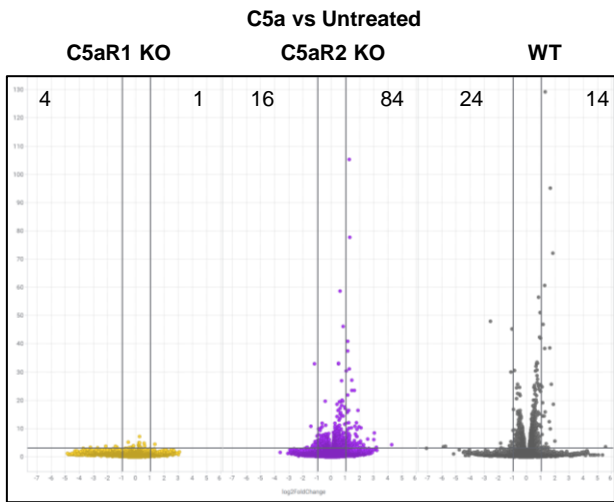

D

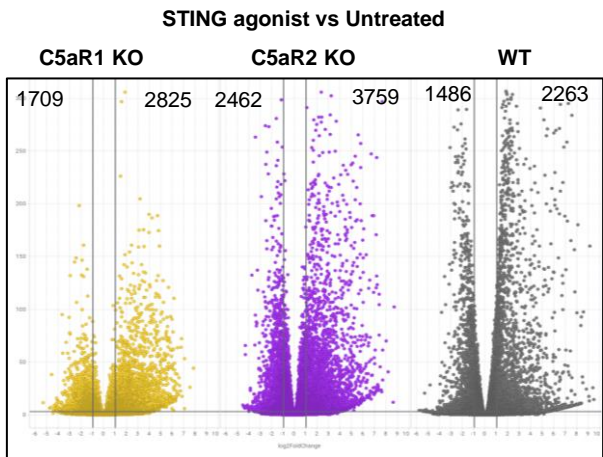

E

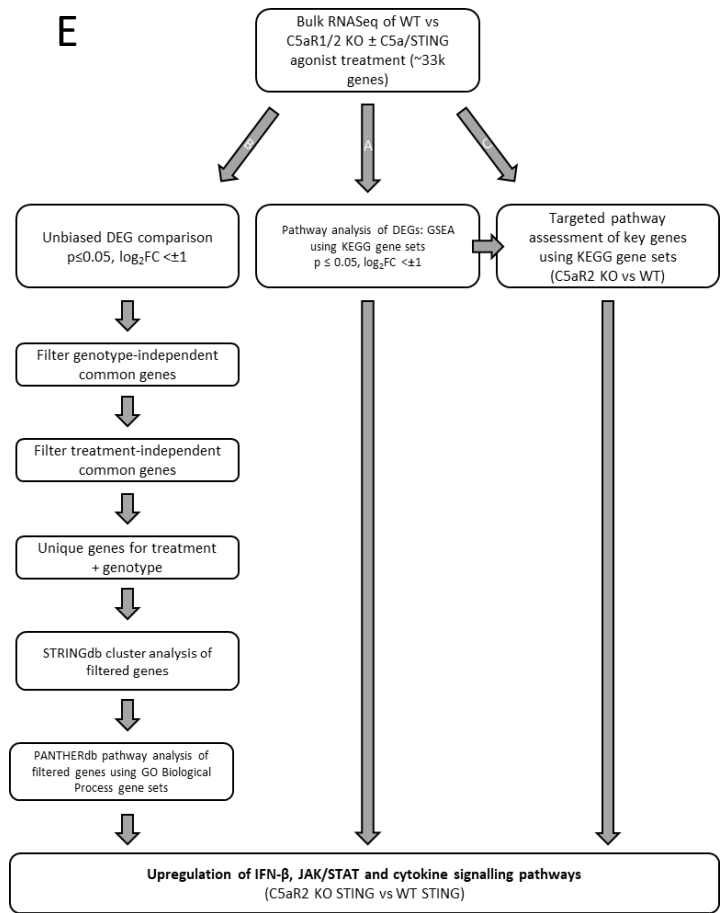

Fig S5

Untreated

C5a-treated

STING agonist

C5aR1 KO

C5aR2 KO

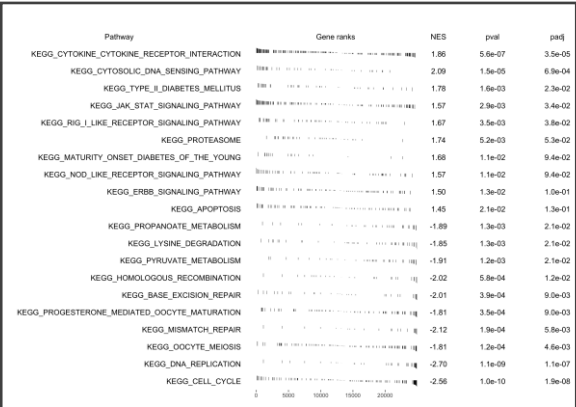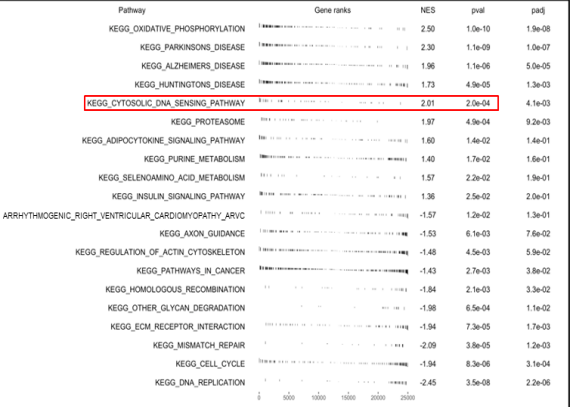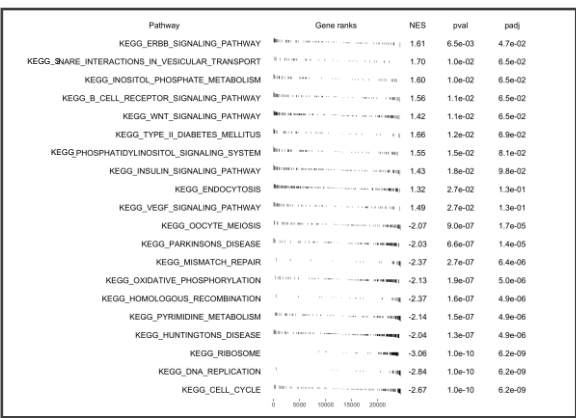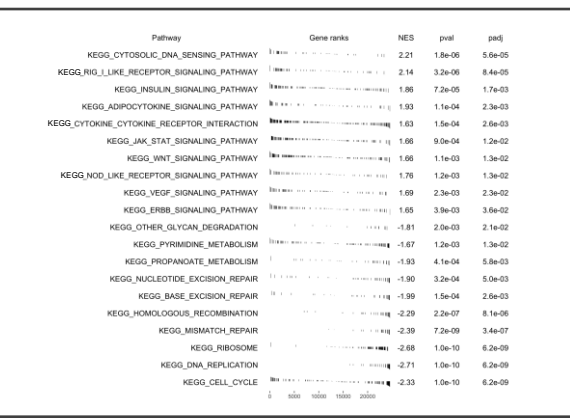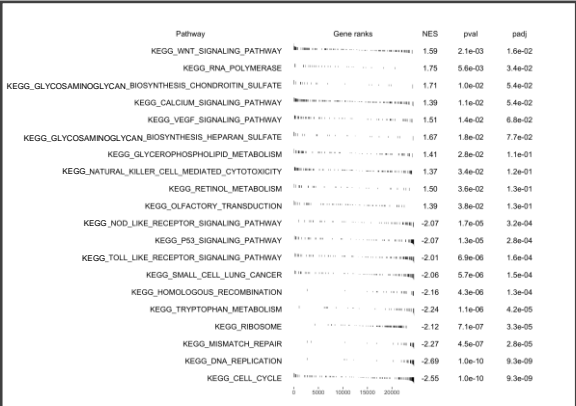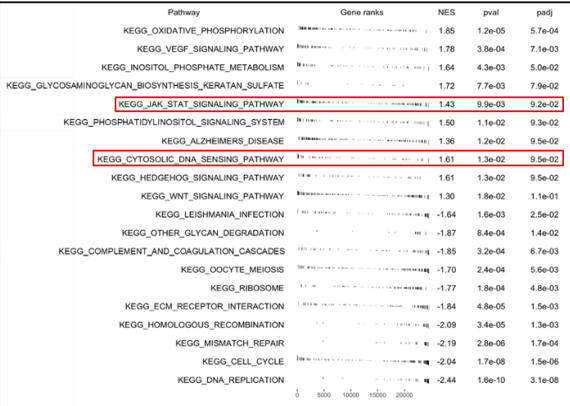

GSEA of wildtype versus C5aR1 (left) or C5aR2 (right) cells, left untreated or treated with C5a or STING agonist.

### Figure S6

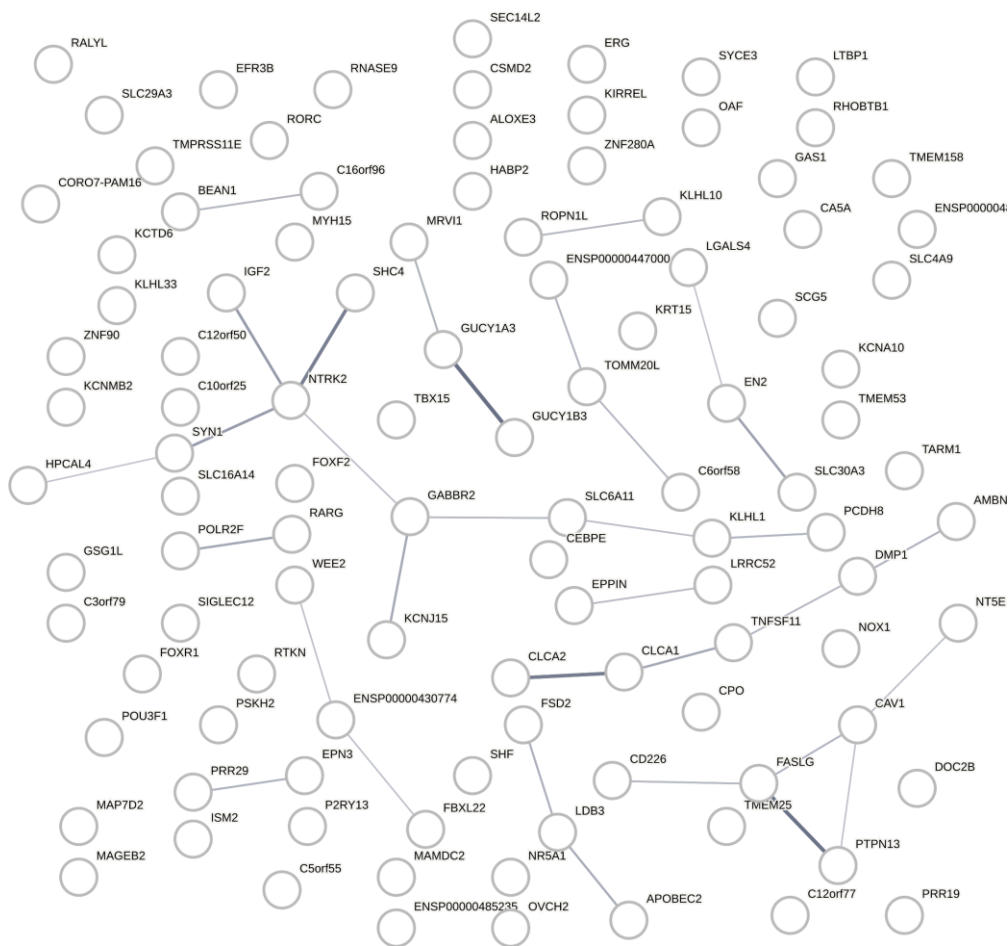

### Figure S7

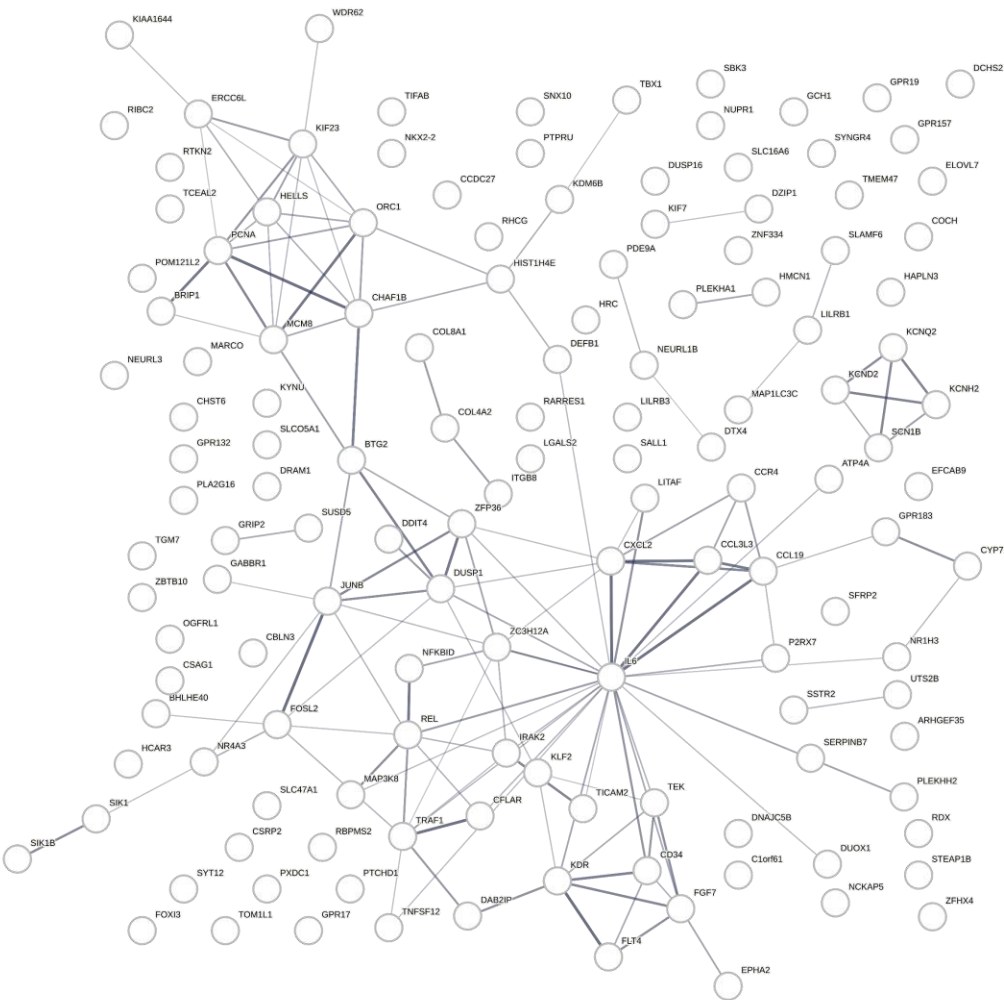



### Figure S8

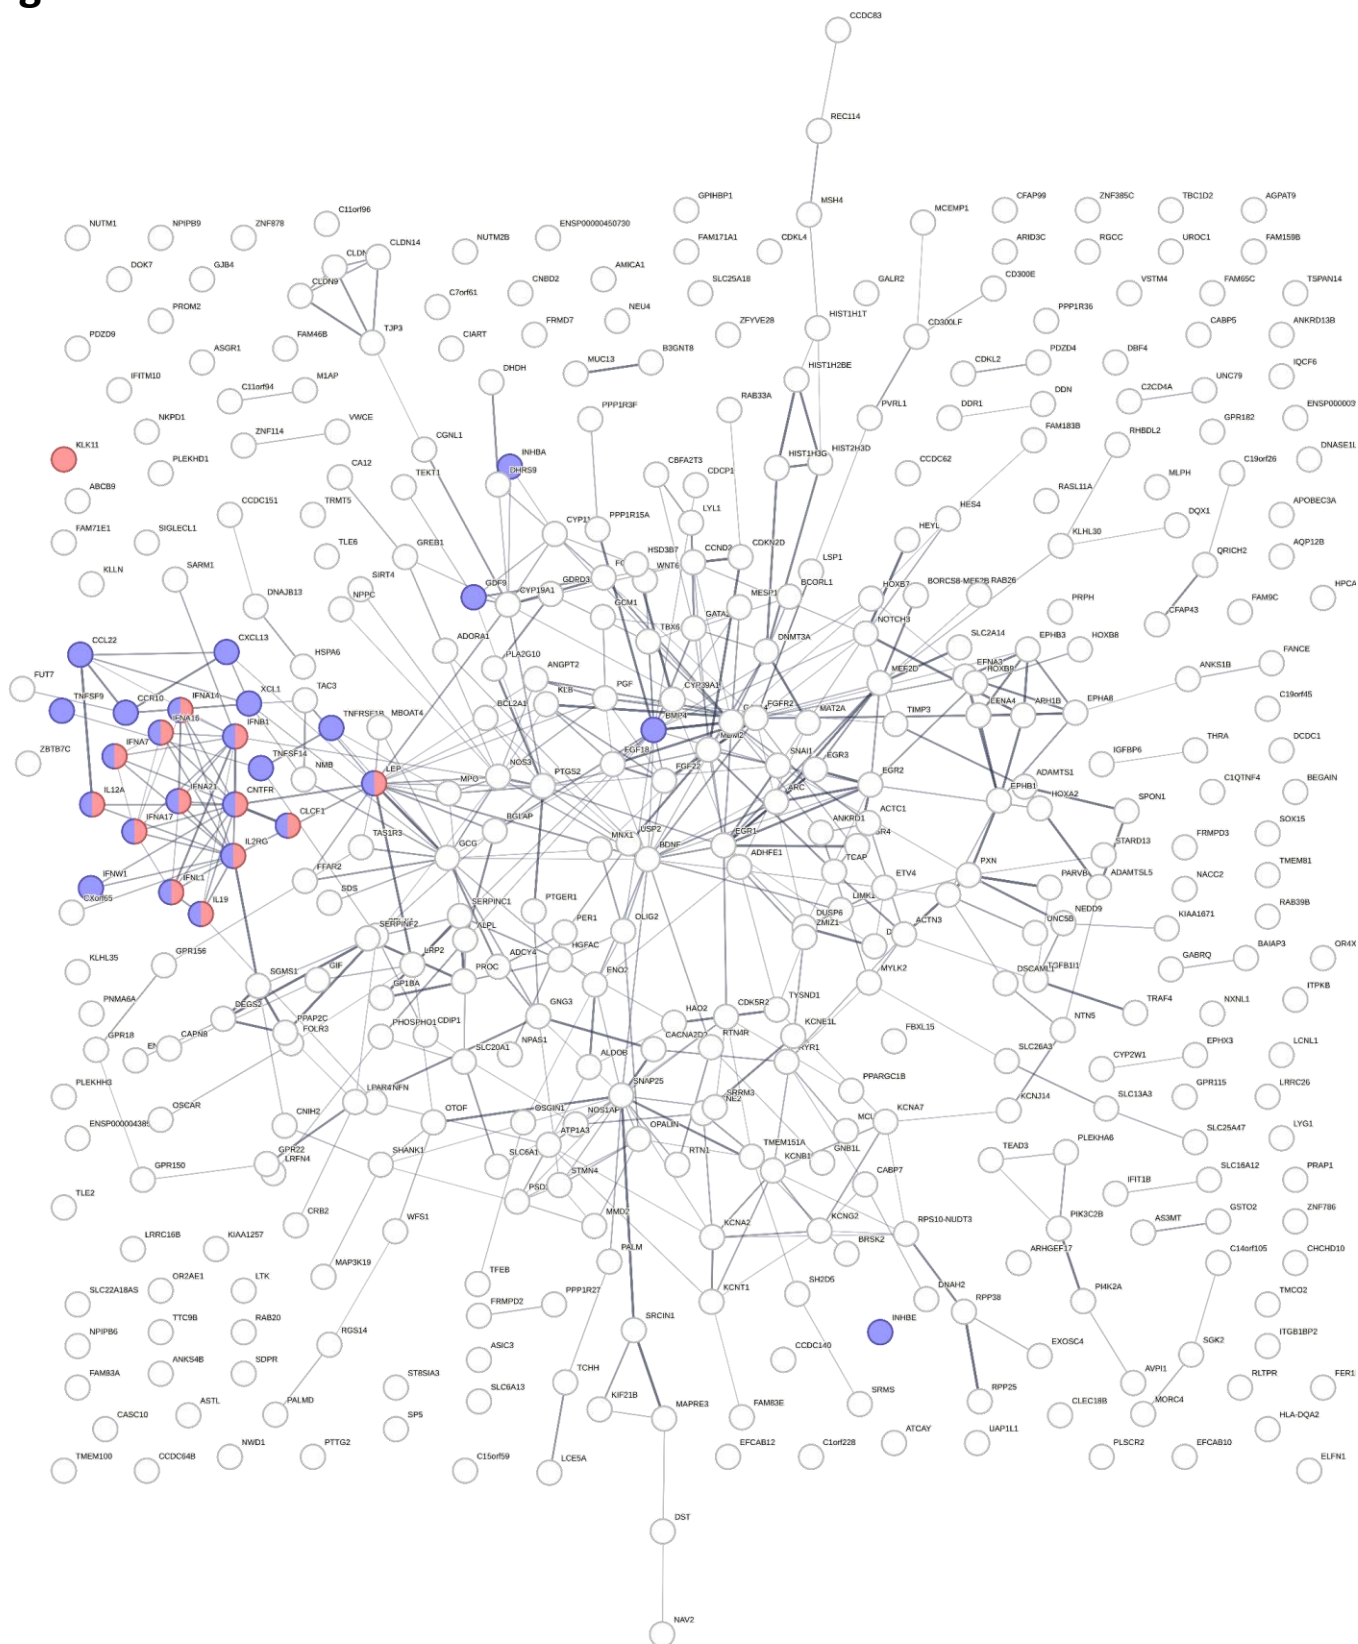



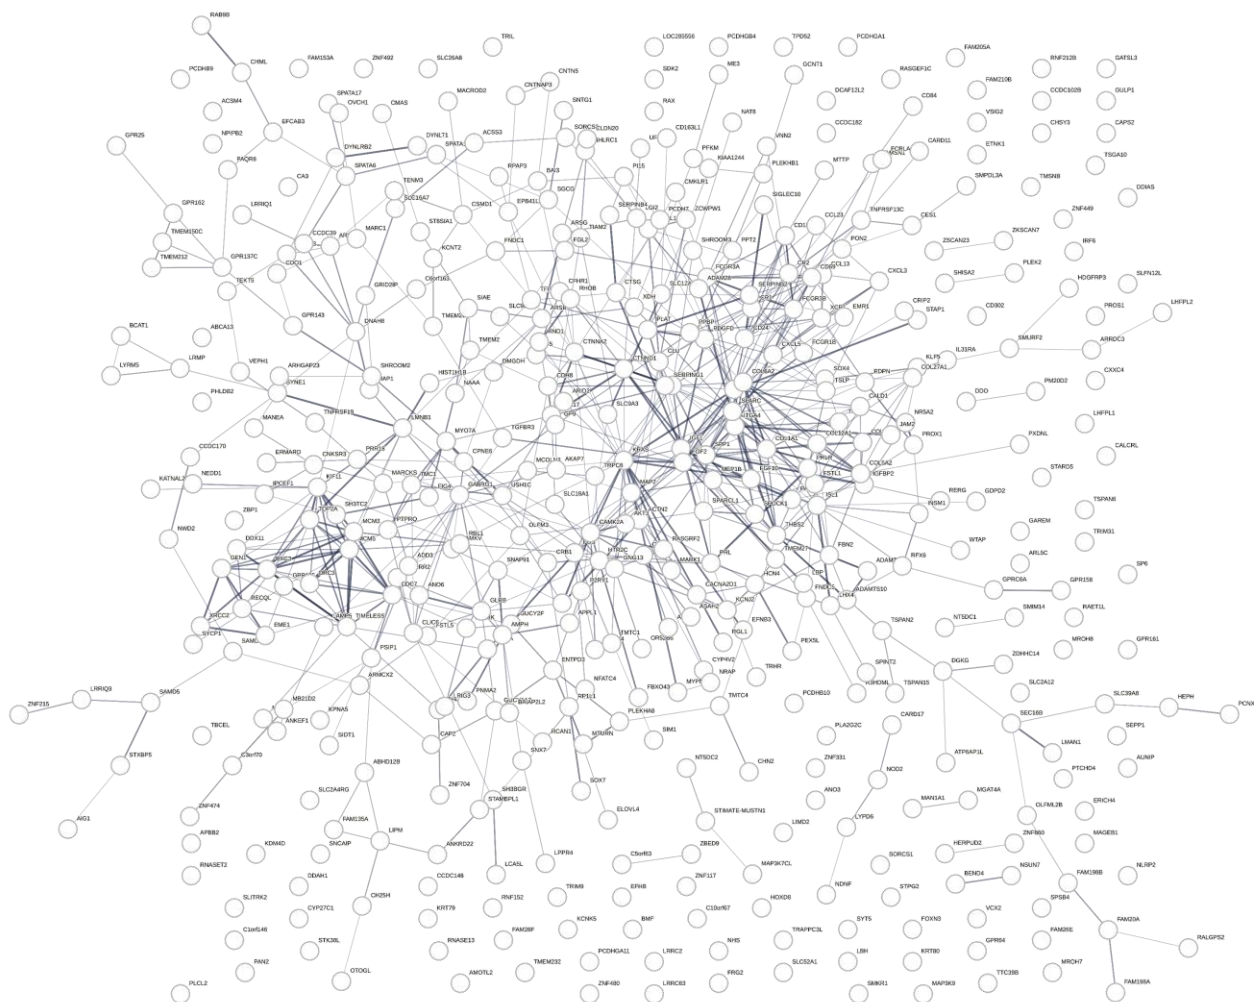

Supplement: s1 [file s1]
